# Supplementary material
Source: PubMed Central journal article supplement (PMC5875339)
Supplement: jamapediatr-172-361-s001.pdf [file jamapediatr-172-361-s001.pdf]

## Supplementary Online Content

Twilhaar ES, Wade RM, de Kieviet JF, van Goudoever JB, van Elburg RM, Oosterlaan J. Cognitive outcomes of children born extremely or very preterm since the 1990s and associated risk factors: a meta-analysis and meta-regression. *JAMA Pediatr*. Published online February 19, 2018. doi:10.1001/jamapediatrics.2017.5323

**eTable.** Study Characteristics, IQ of EP/VP Born and Full-Term Born Children, and Demographic and Perinatal Characteristics of the EP/VP Born Sample

**eFigure 1.** PRISMA Flowchart of the Study Selection Procedure

**eFigure 2.** Forest Plot of Standardized Mean Differences (SMD) in IQ Between Extremely/Very Preterm Children and Full-Term Controls

**eFigure 3.** Funnel Plot of the Standardized Mean Difference in IQ for Each Study Plotted Against Its Standard Error

### **eReferences.**

This supplementary material has been provided by the authors to give readers additional information about their work.

**eTable. Study Characteristics, IQ of EP/VP Born and Full-Term Born Children, and Demographic and Perinatal Characteristics of the EP/VP Born Sample.**

| Study                                | Birth year <sup>a</sup> | Test           | Study quality | EP/VP born                 |          | FT born                    |          | Age at assessment, <i>M</i> ( <i>SD</i> ) |
|--------------------------------------|-------------------------|----------------|---------------|----------------------------|----------|----------------------------|----------|-------------------------------------------|
|                                      |                         |                |               | IQ, <i>M</i> ( <i>SD</i> ) | <i>n</i> | IQ, <i>M</i> ( <i>SD</i> ) | <i>n</i> |                                           |
| Aarnoudse-Moens (2009) <sup>1</sup>  | 1998                    | WPPSI          | 5             | 92.5 (17.5)                | 50       | 109.2 (19.2)               | 50       | 5.9 (0.4)                                 |
| Aarnoudse-Moens (2013) <sup>2</sup>  | 2000                    | WPPSI/WISC TIQ | 5             | 93.3 (15.8)                | 200      | 105.0 (13.4)               | 230      | 8.2 (2.5)                                 |
| Bayless (2007) <sup>3</sup>          | 1993                    | WISC TIQ       | 3             | 98.4 (11.2)                | 40       | 107.1 (12.3)               | 41       | 8.4 (3.8)                                 |
| Brecht (2015) <sup>4</sup>           | 1997                    | WISC TIQ       | 4             | 98.4 (14.8)                | 42       | 109.0 (8.1)                | 24       | 14.3 (0.15)                               |
| Campbell (2015) <sup>5</sup>         | NA                      | WISC TIQ       | 2             | 95.5 (10.7)                | 32       | 107.0 (12.5)               | 40       | 7.1 (0.2)                                 |
| Conrad (2010) <sup>6</sup>           | 1994                    | WISC TIQ       | 5             | 104.0 (15.4)               | 49       | 110.4 (15.1)               | 55       | 12.1 (1.7)                                |
| Constable (2013) <sup>7</sup>        | 1990                    | WISC TIQ       | 3             | 91.7 (12.4)                | 19       | 100.4 (18.7)               | 19       | 20.1 (0.9)                                |
| Crotty (2012) <sup>8</sup>           | 2000                    | DAS            | 4             | 99.0 (14.1)                | 120      | 117.1 (12.8)               | 108      | 6.5 (0.6)                                 |
| Damm (2015) <sup>9</sup>             | 2005                    | KABC           | 5             | 89.6 (13.9)                | 226      | 98.1 (12.2)                | 305      | 5 (NA)                                    |
| De Amorim (2013) <sup>10</sup>       | 1999                    | WISC TIQ       | 5             | 96.3 (12.1)                | 22       | 109.9 (9.6)                | 22       | 7.3 (0.3)                                 |
| De Kieviet (2012) <sup>11</sup>      | 2002                    | WISC TIQ       | 5             | 96.6 (17.6)                | 66       | 105.8 (14.4)               | 66       | 7.5 (0.4)                                 |
| Delane (2016) <sup>12</sup>          | NA                      | WISC TIQ       | 4             | 93.4 (13.8)                | 77       | 110.1 (13.9)               | 74       | 7.2 (0.4)                                 |
| Feng (2011) <sup>13</sup>            | 2004                    | WPPSI TIQ      | 3             | 104.0 (19.0)               | 20       | 122.0 (11.0)               | 41       | 5.3 (0.6)                                 |
| Fjortoft (2015) <sup>14</sup>        | 2000                    | WISC TIQ       | 6             | 88.0 (18.1) <sup>b</sup>   | 38       | 107.0 (12.8)               | 31       | 10.4 (0.8)                                |
| Ford (2016) <sup>15</sup>            | 1991                    | WISC TIQ       | 2             | 10.4 (2.9) <sup>c</sup>    | 35       | 11.6 (2.6) <sup>c</sup>    | 37       | 8.4 (NA)                                  |
| Frye (2010) <sup>16</sup>            | NA                      | SB TIQ         | 3             | 90.9 (10.2)                | 19       | 95.4 (10.0)                | 14       | 15.8 (0.6)                                |
| Geldof (2014) <sup>17</sup>          | 2004                    | WPPSI VIQ, PIQ | 5             | 97.8 (15.0)                | 116      | 108.2 (15.2)               | 73       | 5.5 (0.1)                                 |
| Georgsdottir (2012) <sup>18</sup>    | 1993                    | WPPSI TIQ      | 4             | 94.0 (12.0)                | 32       | 110.0 (12.0)               | 55       | 5.0 (NA)                                  |
| Guarini (2009) <sup>19</sup>         | 1999                    | KBIT           | 3             | 93.7 (11.5)                | 70       | 96.7 (11.4)                | 34       | 6.1 (0.3)                                 |
| Guarini (2014) <sup>20</sup>         | 1997                    | KBIT           | 3             | 103.1 (12.9)               | 84       | 106.5 (9.4)                | 26       | 8.0 (0.3)                                 |
| Guarini (2016) <sup>21</sup>         | 2007                    | Raven          | 5             | 15.2 (3.4)                 | 60       | 19.3 (5.0)                 | 60       | 5.3 (0.3)                                 |
| Hagmann-Von Arx (2014) <sup>22</sup> | 2003                    | WISC TIQ       | 4             | 104.1 (14.1)               | 58       | 111.9 (13.8)               | 55       | 8.2 (1.3)                                 |
| Hansen (2004) <sup>23</sup>          | 1994                    | WPPSI TIQ      | 6             | 99.6 (15.5)                | 252      | 107.3 (11.4)               | 76       | 5.1 (0.2)                                 |
| Harvey (1999) <sup>24</sup>          | 1990                    | PPVT           | 3             | 93.9 (15.0)                | 30       | 104.1 (11.0)               | 50       | 5.2 (0.3)                                 |
| Hellgren (2009) <sup>25</sup>        | NA                      | WISC PIQ       | 5             | 87.0 (20.0)                | 59       | 99.0 (16.0)                | 55       | 15.5 (0.5)                                |
| Holsti (2016) <sup>26</sup>          | 1995                    | WISC TIQ       | 6             | 80.3 (18.7)                | 132      | 104.6 (15.7)               | 103      | 12.0 (1.7)                                |
| Howe (2011) <sup>27</sup>            | 2008                    | WPPSI TIQ      | 2             | 88.8 (16.0)                | 160      | 107.9 (13.7)               | 124      | 5.0 (0.4)                                 |
| Hutchinson (2013) <sup>28</sup>      | 1997                    | WISC TIQ       | 7             | 93.1 (16.1)                | 189      | 105.6 (12.4)               | 173      | 8.5 (0.4)                                 |
| Johnson (2005) <sup>29</sup>         | 1991                    | BAS            | 7             | 101.1 (15.2)               | 187      | 107.2 (13.4)               | 66       | 5.0 (NA)                                  |
| Johnson (2009) <sup>30</sup>         | 1995                    | KABC           | 6             | 83.7 (18.0)                | 219      | 104.1 (11.1)               | 153      | 10.9 (0.4)                                |
| Kallankari (2015) <sup>31</sup>      | 2000                    | WISC TIQ       | 6             | 8.7 (2.5) <sup>c</sup>     | 77       | 10.6 (2.8) <sup>c</sup>    | 27       | 9.0 (0.2)                                 |
| Larroque (2008) <sup>32</sup>        | 1997                    | KABC           | 6             | 93.7 (19.3)                | 1817     | 106.4 (17.8)               | 396      | 5.0 (NA)                                  |
| Lax (2013) <sup>33</sup>             | NA                      | WISC TIQ       | 2             | 101.1 (13.5)               | 25       | 117.5 (14.7)               | 32       | 8.7 (0.9)                                 |
| Leijon (2015) <sup>34</sup>          | 1998                    | WISC TIQ       | 6             | 16.9 (8.0) <sup>c</sup>    | 51       | 26.4 (7.7) <sup>c</sup>    | 51       | 7.8 (0.4)                                 |
| Linden (2015) <sup>35</sup>          | 2002                    | WISC TIQ       | 4             | 100.7 (13.7)               | 100      | 110.6 (12.0)               | 50       | 7.0 (NA)                                  |

**eTable. Study Characteristics, IQ of EP/VP Born and Full-Term Born Children, and Demographic and Perinatal Characteristics of the EP/VP Born Sample. (continued)**

| Study                               | Birth year <sup>a</sup> | Test           | Study quality | EP/VP born                |     | FT born                 |     | Age at assessment, M (SD) |
|-------------------------------------|-------------------------|----------------|---------------|---------------------------|-----|-------------------------|-----|---------------------------|
|                                     |                         |                |               | IQ, M (SD)                | n   | IQ, M (SD)              | n   |                           |
| Linhares (2005) <sup>36</sup>       | NA                      | Raven          | 4             | 37.0 (24.0)               | 20  | 62.8 (24.3)             | 20  | 8.8 (NA)                  |
| Litt (2012) <sup>37</sup>           | 1993                    | WASI TIQ       | 6             | 87.1 (18.9)               | 181 | 96.4 (13.4)             | 115 | 14.8 (NA)                 |
| Løhaugen (2011) <sup>38</sup>       | 1992                    | WISC TIQ       | 4             | 78.0 (13.0)               | 16  | 100.0 (12.0)            | 19  | 14.1 (0.6)                |
| Martinez-Cruz (2006) <sup>39</sup>  | 1997                    | SB TIQ         | 5             | 100.6 (13.5) <sup>b</sup> | 77  | 106.8 (11.7)            | 41  | 6.9 (0.8)                 |
| McGrath (2002) <sup>40</sup>        | NA                      | WISC TIQ       | 5             | 93.9 (17.8)               | 100 | 103.9 (13.0)            | 37  | 8.0 (0.2)                 |
| McNicholas (2014) <sup>41</sup>     | 1996                    | WISC TIQ       | 4             | 89.7 (12.5)               | 55  | 101.3 (11.7)            | 45  | 11.6 (1.0)                |
| Molloy (2014) <sup>42</sup>         | 1991                    | WISC TIQ       | 5             | 95.2 (16.3)               | 221 | 106.5 (13.7)            | 159 | 17.0 (1.5)                |
| Morsing (2011) <sup>43</sup>        | 2001                    | WISC TIQ       | 6             | 85.0 (15.4) <sup>b</sup>  | 68  | 102.9 (13.2)            | 34  | 7.1 (NA)                  |
| Mu (2008) <sup>44</sup>             | 1996                    | WISC TIQ       | 4             | 93.1 (16.3)               | 130 | 111.1 (14.8)            | 59  | 8.0 (NA)                  |
| Mulder (2011) <sup>45</sup>         | 1998                    | WISC TIQ       | 4             | 90.8 (12.6)               | 56  | 104.6 (9.6)             | 22  | 9.8 (0.3)                 |
| Murray (2014) <sup>46</sup>         | 2002                    | WISC TIQ       | 6             | 97.1 (13.8)               | 198 | 107.2 (12.8)            | 70  | 7.5 (0.3)                 |
| Newsham (2007) <sup>47</sup>        | 1991                    | WISC TIQ       | 2             | 98.5 (7.0)                | 36  | 105.5 (7.5)             | 33  | 10.1 (1.0)                |
| Ni (2011) <sup>48</sup>             | 2002                    | WISC TIQ       | 5             | 100.1 (10.7)              | 37  | 103.9 (11.1)            | 22  | 6.6 (0.2)                 |
| Northam (2012) <sup>49</sup>        | 1991                    | WISC TIQ       | 6             | 92.0 (15.5)               | 50  | 107.5 (17.3)            | 50  | 16.2 (1.2)                |
| Oliveira (2011) <sup>50</sup>       | 2005                    | WISC TIQ       | 4             | 9.0 (2.4) <sup>c</sup>    | 23  | 12.0 (2.4) <sup>c</sup> | 23  | 5.8 (0.6)                 |
| Ortiz-Mantilla (2008) <sup>51</sup> | 1997                    | SB TIQ         | 6             | 97.9 (10.4)               | 32  | 108.1 (9.1)             | 32  | 7.0 (NA)                  |
| Potharst (2011) <sup>52</sup>       | 2003                    | WPPSI TIQ      | 5             | 92.0 (17.0)               | 104 | 103.0 (11.0)            | 95  | 5.0 (NA)                  |
| Ritter (2013) <sup>53</sup>         | 2000                    | WISC IV TIQ    | 5             | 101.1 (9.1)               | 56  | 109.8 (8.5)             | 41  | 10.1 (1.5)                |
| Roldán-Tapia (2013) <sup>54</sup>   | 2000                    | KABC           | 5             | 43.0 (6.3)                | 31  | 64.0 (9.7)              | 46  | 7.0 (NA)                  |
| Sayeur (2015) <sup>55</sup>         | 2003                    | WISC TIQ       | 2             | 111.6 (10.5)              | 10  | 112.4 (8.9)             | 10  | 7.6 (0.5)                 |
| Schneider (2014) <sup>56</sup>      | 1996                    | WJ-GIA         | 1             | 93.8 (13.0)               | 38  | 99.3 (11.2)             | 44  | 12.4 (0.8)                |
| Serenius (2016) <sup>57</sup>       | 2005                    | WISC TIQ       | 5             | 83.4 (14.8)               | 371 | 100.3 (11.7)            | 367 | 6.6 (NA)                  |
| Short (2003) <sup>58</sup>          | 1990                    | WISC TIQ       | 6             | 86.7 (18.4) <sup>b</sup>  | 164 | 101.9 (15.0)            | 99  | 8.8 (0.6)                 |
| Simms (2015) <sup>59</sup>          | 2002                    | Raven          | 7             | 97.8 (19.4)               | 115 | 104.9 (20.8)            | 77  | 9.7 (0.7)                 |
| Smith (2011) <sup>60</sup>          | NA                      | SB TIQ         | 5             | 96.1 (11.1)               | 57  | 107.2 (13.9)            | 57  | 8.4 (0.8)                 |
| Snyder (2007) <sup>61</sup>         | 1997                    | KBIT           | 4             | 100.6 (11.6)              | 96  | 102.5 (12.8)            | 67  | 5.3 (0.5)                 |
| Sølsnes (2015) <sup>62</sup>        | 2005                    | WPPSI/WISC TIQ | 5             | 98.0 (10.0)               | 37  | 108.0 (14.0)            | 104 | 7.8 (1.7)                 |
| Stolt (2014) <sup>63</sup>          | 2003                    | WPPSI TIQ      | 4             | 100.0 (18.0)              | 141 | 113.0 (15.0)            | 146 | 5.0 (NA)                  |
| Taylor (2010) <sup>64</sup>         | NA                      | PPVT           | 3             | 106.5 (11.5)              | 23  | 112.3 (12.6)            | 20  | 7.0 (NA)                  |
| Taylor (2011) <sup>65</sup>         | 2002                    | WJ-BIA         | 7             | 86.3 (21.1)               | 148 | 105.5 (16.6)            | 111 | 6.0 (0.4)                 |
| Tinelli (2015) <sup>66</sup>        | 2002                    | WISC TIQ       | 3             | 93.7 (16.6)               | 29  | 101.2 (11.2)            | 26  | 8.7 (1.3)                 |
| Van Braeckel (2008) <sup>67</sup>   | 1994                    | WISC TIQ       | 5             | 95.0 (9.0)                | 55  | 105.0 (8.0)             | 45  | 9.9 (0.1)                 |
| Wehrle (2016) <sup>68</sup>         | 1999                    | WISC TIQ       | 5             | 104.4 (7.3)               | 41  | 109.5 (6.8)             | 43  | 12.9 (1.7)                |
| Williamson (2014) <sup>69</sup>     | NA                      | PPVT           | 4             | 108.4 (12.3)              | 34  | 112.5 (11.2)            | 36  | 10.0 (1.3)                |
| Wolfe (2015) <sup>70</sup>          | 2006                    | WPPSI TIQ      | 5             | 90.7 (14.9)               | 20  | 101.2 (12.3)            | 18  | 5.7 (0.7)                 |
| Woodward (2012) <sup>71</sup>       | 1999                    | WPPSI TIQ      | 7             | 94.9 (15.6)               | 109 | 106.9 (11.7)            | 106 | 6.0 (0.1)                 |

**eTable. Study Characteristics, IQ of EP/VP Born and Full-Term Born Children, and Demographic and Perinatal Characteristics of the EP/VP Born Sample. (continued)**

| Study                                | GA, weeks<br>M (SD) | BW, grams<br>M (SD) | SGA,<br>% | IVH<br>grade<br>I/II, % | IVH<br>grade<br>III/IV, % | PVL,<br>% | BPD,<br>%         | NEC,<br>% | Sepsis,<br>% | PNS,<br>% | Male,<br>% | Nonwhite,<br>% |
|--------------------------------------|---------------------|---------------------|-----------|-------------------------|---------------------------|-----------|-------------------|-----------|--------------|-----------|------------|----------------|
| Aarnoudse-Moens (2009) <sup>1</sup>  | 28.0 (1.4)          | 1042.6 (318.0)      | 6.0       | 22.0                    | 0.0                       | 4.0       | 54.0 <sup>d</sup> | 0.0       | 6.0          | 18.0      | 54.0       | 10.0           |
| Aarnoudse-Moens (2013) <sup>2</sup>  | 28.1 (1.4)          | 1013.0 (287.0)      | NA        | 21.0                    | 5.0                       | 1.0       | 11.0 <sup>d</sup> | 3.0       | NA           | 20.0      | 47.8       | 0.0            |
| Bayless (2007) <sup>3</sup>          | 28.4 (2.1)          | 1200.8 (368.3)      | 12.5      | 20.0                    | 0.0                       | NA        | 37.5 <sup>e</sup> | NA        | NA           | 12.5      | 40.0       | NA             |
| Brecht (2015) <sup>4</sup>           | 27.6 (2.3)          | 1119.9 (326.6)      | 11.9      | 14.3                    | 4.8                       | NA        | 14.3 <sup>d</sup> | NA        | 14.3         | NA        | 53.0       | 0.0            |
| Campbell (2015) <sup>5</sup>         | 25.9 (1.7)          | 862.2 (211.2)       | NA        | NA                      | NA                        | NA        | NA                | NA        | NA           | NA        | 51.6       | NA             |
| Conrad (2010) <sup>6</sup>           | 27.7 (2.0)          | 939.0 (111.1)       | NA        | 24.0                    | 14.0                      | NA        | NA                | NA        | 52.0         | NA        | 53.0       | 17.0           |
| Constable (2013) <sup>7</sup>        | 28.2 (1.8)          | 974.6 (163.2)       | NA        | 0.0                     | 0.0                       | 0.0       | 15.8 <sup>f</sup> | 5.3       | NA           | NA        | 57.9       | NA             |
| Crotty (2012) <sup>8</sup>           | 26.3 (2.3)          | 772.8 (131.3)       | 22.8      | 13.2                    | 2.6                       | 0.9       | 59.6 <sup>f</sup> | 4.4       | 28.9         | 52.6      | 64.9       | 48.2           |
| Damm (2015) <sup>9</sup>             | NA                  | NA                  | NA        | NA                      | NA                        | NA        | NA                | NA        | NA           | NA        | NA         | NA             |
| De Amorim (2013) <sup>10</sup>       | 30.0 (2.0)          | 1172.5 (222.5)      | NA        | 18.2                    | NA                        | NA        | NA                | NA        | 59.0         | NA        | 31.8       | NA             |
| De Kieviet (2012) <sup>11</sup>      | 29.3 (1.6)          | 1241.0 (355.0)      | 27.3      | 18.2                    | 3.0                       | 6.1       | 28.8 <sup>f</sup> | 1.5       | 63.6         | NA        | 50.0       | 13.6           |
| Delane (2016) <sup>12</sup>          | 27.5 (2.3)          | 1078.8 (424.8)      | NA        | NA                      | NA                        | NA        | NA                | NA        | NA           | NA        | 51.9       | NA             |
| Feng (2011) <sup>13</sup>            | 30.0 (2.0)          | 1296.0 (183.0)      | 25.0      | 20.0                    | 0.0                       | 5.0       | 0.0               | 15.0      | 10.0         | 0.0       | 50.0       | 100.0          |
| Fjortoft (2015) <sup>14</sup>        | 26.7 (1.7)          | 866.9 (216.0)       | 10.0      | 34.2                    | 10.5                      | 2.6       | 55.3 <sup>e</sup> | 3.0       | 29.0         | 26.3      | 44.7       | 15.0           |
| Ford (2016) <sup>15</sup>            | 27.0 (2.2)          | 893.0 (185.4)       | 28.6      | 25.7                    | 0.0                       | 0.0       | 31.4 <sup>d</sup> | 2.9       | NA           | NA        | 48.6       | 0.0            |
| Frye (2010) <sup>16</sup>            | 29.8 (2.3)          | 1153.0 (271.0)      | 5.3       | 0.0                     | 0.0                       | 0.0       | 15.8 <sup>f</sup> | 0.0       | NA           | NA        | 47.3       | 80.0           |
| Geldof (2014) <sup>17</sup>          | 30.0 (1.0)          | 1233.8 (148.8)      | 24.0      | 16.0                    | 5.0                       | 11.0      | 21.0 <sup>d</sup> | 3.0       | 48.0         | 5.0       | 49.1       | NA             |
| Georgsdottir (2012) <sup>18</sup>    | 27.0 (2.0)          | 832.0 (191.0)       | 46.9      | 0.0                     | 3.1                       | 0.0       | 65.6 <sup>f</sup> | 3.1       | 56.3         | NA        | 16.1       | 0.0            |
| Guarini (2009) <sup>19</sup>         | 29.7 (2.3)          | 1137.0 (327.7)      | 45.7      | 17.1                    | 0.0                       | 0.0       | 20.0 <sup>f</sup> | NA        | NA           | NA        | 51.4       | 0.0            |
| Guarini (2014) <sup>20</sup>         | 30.1 (2.3)          | 1224.0 (284.0)      | 37.0      | 10.0                    | 0.0                       | 0.0       | 14.0 <sup>f</sup> | NA        | NA           | NA        | 53.6       | 0.0            |
| Guarini (2016) <sup>21</sup>         | 28.9 (2.3)          | 1177.5 (360.3)      | 10.0      | 3.0                     | 0.0                       | 0.0       | 22.0 <sup>f</sup> | 7.0       | 12.0         | 15.0      | 48.3       | 0.0            |
| Hagmann-Von Arx (2014) <sup>22</sup> | 29.7 (1.9)          | 1302.0 (408.0)      | 5.2       | 7.0                     | 0.0                       | 0.0       | 5.2 <sup>f</sup>  | 1.7       | 0.0          | 6.9       | 69.0       | NA             |
| Hansen (2004) <sup>23</sup>          | 27.5 (1.8)          | 922.0 (167.0)       | NA        | NA                      | NA                        | NA        | 16.0 <sup>d</sup> | NA        | NA           | NA        | 49.0       | NA             |
| Harvey (1999) <sup>24</sup>          | 27.0 (2.3)          | 846.0 (103.0)       | 20.0      | NA                      | 6.7                       | NA        | 73.3 <sup>e</sup> | 13.3      | NA           | NA        | 53.3       | NA             |
| Hellgren (2009) <sup>25</sup>        | 31.0 (3.5)          | 1197.0 (237.2)      | NA        | NA                      | NA                        | NA        | NA                | NA        | NA           | NA        | 56.0       | NA             |
| Holsti (2016) <sup>26</sup>          | 24.4 (0.7)          | 718.0 (129.0)       | 15.9      | NA                      | NA                        | NA        | 38.6 <sup>f</sup> | NA        | NA           | NA        | 45.5       | NA             |
| Howe (2011) <sup>27</sup>            | 29.0 (2.6)          | 1129.0 (252.9)      | 30.1      | NA                      | NA                        | 7.0       | NA                | NA        | NA           | NA        | 46.5       | NA             |
| Hutchinson (2013) <sup>28</sup>      | 26.5 (2.0)          | 833.0 (164.0)       | 18.0      | NA                      | 3.7                       | 3.2       | 38.1 <sup>d</sup> | 5.0       | NA           | 37.0      | 52.9       | NA             |
| Johnson (2005) <sup>29</sup>         | 30.3 (0.9)          | 1430.0 (161.8)      | 7.0       | NA                      | NA                        | 8.0       | NA                | NA        | NA           | NA        | 60.0       | NA             |
| Johnson (2009) <sup>30</sup>         | 24.5 (0.7)          | 745.0 (130.0)       | 0.5       | 49.0                    | 10.0                      | 16.0      | 73.0 <sup>d</sup> | 3.0       | NA           | 72.0      | 46.0       | 18.0           |
| Kallankari (2015) <sup>31</sup>      | 29.0 (2.3)          | 1202.0 (557.0)      | 23.0      | 2.6                     | 3.9                       | 2.6       | 23.0 <sup>d</sup> | 3.9       | 30.0         | 22.1      | 52.0       | 2.6            |
| Larroque (2008) <sup>32</sup>        | 30.0 (2.0)          | 1379.0 (396.0)      | 33.8      | 20.0                    | 3.4                       | 4.0       | 12.0 <sup>f</sup> | 3.0       | 50.2         | 17.4      | 44.6       | NA             |
| Lax (2013) <sup>33</sup>             | 27.4 (2.0)          | NA                  | 0.0       | 24.0                    | 0.0                       | 0.0       | NA                | 0.0       | NA           | NA        | 60.0       | NA             |
| Leijon (2015) <sup>34</sup>          | 28.8 (2.2)          | 1105 (291)          | 57        | 15.6                    | 2.2                       | 5.0       | 27.0 <sup>d</sup> | NA        | 27.5         | 6.4       | 37.3       | NA             |
| Linden (2015) <sup>35</sup>          | 29.6 (2.4)          | 1322.0 (434.0)      | 10.0      | 6.0                     | 0.0                       | 0.0       | NA                | NA        | NA           | 8.0       | 50.0       | 23.0           |

**eTable. Study Characteristics, IQ of EP/VP Born and Full-Term Born Children, and Demographic and Perinatal Characteristics of the EP/VP Born Sample. (continued)**

| Study                               | GA, weeks<br>M (SD) | BW, grams<br>M (SD) | SGA,<br>% | IVH<br>grade<br>I/II, % | IVH<br>grade<br>III/IV, % | PVL,<br>% | BPD,<br>%         | NEC,<br>% | Sepsis,<br>% | PNS,<br>% | Male,<br>% | Nonwhite,<br>% |
|-------------------------------------|---------------------|---------------------|-----------|-------------------------|---------------------------|-----------|-------------------|-----------|--------------|-----------|------------|----------------|
| Linhares (2005) <sup>36</sup>       | 29.0 (3.0)          | 1150.0 (270.0)      | NA        | NA                      | NA                        | NA        | NA                | NA        | NA           | NA        | NA         | NA             |
| Litt (2012) <sup>37</sup>           | 26.4 (2.0)          | 815.0 (124.0)       | 33.2      | 34.3                    | 13.3                      | 6.6       | 41.0 <sup>d</sup> | 5.5       | 49.2         | NA        | 38.7       | 60.0           |
| Løhaugen (2011) <sup>38</sup>       | 25.8 (1.8)          | 778.0 (118.0)       | NA        | NA                      | NA                        | NA        | NA                | NA        | NA           | NA        | 31.0       | NA             |
| Martinez-Cruz (2006) <sup>39</sup>  | 32.1 (1.4)          | 1160.9 (123.2)      | NA        | 16.9                    | 1.2                       | NA        | 27.3 <sup>e</sup> | NA        | 71.4         | 0.0       | 34.0       | NA             |
| McGrath (2002) <sup>40</sup>        | 28.7 (2.1)          | 973.5 (249.6)       | NA        | 16.0                    | 11.9                      | NA        | 28.7 <sup>d</sup> | 13.0      | 13.0         | NA        | NA         | NA             |
| McNicholas (2014) <sup>41</sup>     | 29.9 (2.8)          | 1172.0 (219.0)      | NA        | 20.0                    | NA                        | 8.9       | NA                | NA        | NA           | NA        | NA         | NA             |
| Molloy (2014) <sup>42</sup>         | 26.6 (2.0)          | 883.0 (161.0)       | 15.8      | NA                      | 6.8                       | 4.1       | 34.8 <sup>f</sup> | NA        | NA           | 31.2      | 42.5       | NA             |
| Morsing (2011) <sup>43</sup>        | 27.1 (1.5)          | 879.5 (239.1)       | 50.0      | 11.8                    | 7.4                       | 4.4       | 50.0 <sup>d</sup> | 5.9       | 73.5         | 29.4      | 52.9       | 8.5            |
| Mu (2008) <sup>44</sup>             | 29.4 (2.8)          | 1168.6 (239.1)      | NA        | NA                      | NA                        | NA        | NA                | NA        | NA           | NA        | 44.6       | NA             |
| Mulder (2011) <sup>45</sup>         | 27.6 (1.8)          | NA                  | NA        | NA                      | NA                        | NA        | NA                | NA        | NA           | NA        | 45.0       | NA             |
| Murray (2014) <sup>46</sup>         | 27.4 (1.9)          | 960.0 (222.0)       | 8.6       | NA                      | 3.6                       | 4.6       | 35.0 <sup>f</sup> | 10.6      | 44.4         | 8.6       | 52.5       | NA             |
| Newsham (2007) <sup>47</sup>        | 29.9 (2.7)          | 1421.0 (516.2)      | NA        | NA                      | NA                        | NA        | NA                | NA        | NA           | NA        | 51.4       | NA             |
| Ni (2011) <sup>48</sup>             | 29.5 (2.8)          | 1158.3 (266.1)      | 35.0      | 16.0                    | 0.0                       | 0.0       | 14.0 <sup>f</sup> | 22.0      | 41.0         | 51.0      | 54.1       | NA             |
| Northam (2012) <sup>49</sup>        | 27.0 (2.0)          | 1081.0 (385.0)      | 14.3      | 34.0                    | 22.0                      | 4.1       | NA                | NA        | NA           | NA        | 38.0       | NA             |
| Oliveira (2011) <sup>50</sup>       | 30.0 (0.4)          | 1201.3 (177.5)      | NA        | NA                      | NA                        | NA        | NA                | NA        | NA           | NA        | 60.9       | NA             |
| Ortiz-Mantilla (2008) <sup>51</sup> | 26.9 (2.2)          | 976.0 (245.5)       | 0.0       | 12.5                    | 6.3                       | NA        | 3.1 <sup>d</sup>  | 3.1       | NA           | NA        | 34.4       | 31.0           |
| Potharst (2011) <sup>52</sup>       | 28.7 (1.6)          | 1045.0 (254.0)      | 37.5      | 2.9                     | 2.9                       | 4.8       | 14.4 <sup>d</sup> | 1.9       | 26.9         | 3.8       | 44.2       | NA             |
| Ritter (2013) <sup>53</sup>         | 29.9 (2.3)          | 1252.5 (431.6)      | 14.3      | 10.7                    | 0.0                       | 0.0       | 17.9 <sup>e</sup> | 7.1       | 5.4          | 16.1      | 54.0       | 4.0            |
| Roldán-Tapia (2013) <sup>54</sup>   | 28.8 (1.7)          | 1270.0 (310.0)      | NA        | 25.8                    | 6.45                      | 22.6      | NA                | NA        | NA           | NA        | NA         | 0.0            |
| Sayeur (2015) <sup>55</sup>         | 28.7 (1.8)          | 1222.0 (238.0)      | NA        | 0.0                     | 0.0                       | 0.0       | 20.0 <sup>f</sup> | 20.0      | 0.0          | NA        | 50.0       | 10.0           |
| Schneider (2014) <sup>56</sup>      | 29.7 (2.2)          | 1369.7 (393.4)      | 10.2      | 0.0                     | 0.0                       | 0.0       | NA                | 10.5      | 2.6          | 15.8      | 50.0       | 0.0            |
| Serenius (2016) <sup>57</sup>       | 25.4 (1.1)          | 779.0 (170.0)       | 17.9      | NA                      | 10.0                      | NA        | 73.7 <sup>d</sup> | 5.4       | 47.4         | 27.9      | 53.5       | NA             |
| Short (2003) <sup>58</sup>          | 28.3 (2.0)          | 1085.0 (223.0)      | NA        | 22.5                    | 10.4                      | 7.4       | 57.0 <sup>e</sup> | 32.0      | NA           | 17.1      | 49.1       | 47.0           |
| Simms (2015) <sup>59</sup>          | 28.6 (2.0)          | 1213.0 (365.0)      | NA        | NA                      | NA                        | NA        | NA                | NA        | NA           | NA        | 54.8       | NA             |
| Smith (2011) <sup>60</sup>          | 29.1 (1.7)          | 1453.0 (331.0)      | NA        | 0.0                     | 0.0                       | NA        | NA                | NA        | NA           | NA        | NA         | NA             |
| Snyder (2007) <sup>61</sup>         | 27.8 (NA)           | 1009.3 (261.9)      | 0.0       | 0.0                     | 0.0                       | 0.0       | NA                | NA        | NA           | NA        | 44.8       | 29.2           |
| Sølsnes (2015) <sup>62</sup>        | 28.5 (2.0)          | 1050.0 (358.0)      | 8.0       | 5.4                     | 2.7                       | NA        | 29.7 <sup>f</sup> | 2.7       | 35.1         | NA        | 43.2       | NA             |
| Stolt (2014) <sup>63</sup>          | 28.0 (3.0)          | 1066.0 (283.0)      | 38.0      | NA                      | NA                        | NA        | 17.0 <sup>d</sup> | NA        | NA           | NA        | 58.0       | NA             |
| Taylor (2010) <sup>64</sup>         | 29.0 (2.0)          | 1224.0 (205.0)      | 0.0       | 21.7                    | 13.0                      | 8.7       | 17.4 <sup>f</sup> | NA        | 34.8         | NA        | 47.8       | NA             |
| Taylor (2011) <sup>65</sup>         | 25.9 (1.6)          | 818.0 (174.0)       | 25.0      | NA                      | 10.1                      | NA        | 52.0 <sup>d</sup> | 5.0       | 49.0         | NA        | 45.9       | 39.5           |
| Tinelli (2015) <sup>66</sup>        | 28.3 (2.3)          | 1107.0 (288.0)      | 17.0      | 6.9                     | 0.0                       | 24.0      | 7.0 <sup>f</sup>  | 0.0       | 7.0          | 51.7      | 34.5       | 10.0           |
| Van Braeckel (2008) <sup>67</sup>   | 29.9 (2.3)          | 1192.0 (347.9)      | 25.0      | 20.0                    | 0.0                       | 42.0      | 25.0 <sup>d</sup> | 4.0       | 36.0         | 11.0      | 54.5       | 4.0            |
| Wehrle (2016) <sup>68</sup>         | 29.6 (2.1)          | 1312.0 (362)        | 7.3       | 26.8                    | 0.0                       | 0.0       | 14.6 <sup>f</sup> | 7.3       | 19.5         | 0.0       | 56.1       | NA             |
| Williamson (2014) <sup>69</sup>     | 28.3 (2.3)          | 1080.8 (247.0)      | 8.8       | 23.5                    | 14.7                      | 5.9       | 44.1 <sup>e</sup> | 5.9       | 26.5         | NA        | 47.1       | NA             |
| Wolfe (2015) <sup>70</sup>          | 28.1 (2.7)          | 1102.2 (256.8)      | NA        | 20.0                    | 10.0                      | 0.0       | 38.0 <sup>f</sup> | 5.0       | 0.0          | 10.0      | 55.0       | 45.0           |
| Woodward (2012) <sup>71</sup>       | 27.9 (2.3)          | 1065.9 (312.6)      | 10.1      | 10.1                    | 5.5                       | 5.5       | 34.0 <sup>d</sup> | 4.6       | 23.9         | 5.7       | 50.9       | 11.9           |

**eTable. Study Characteristics, IQ of EP/VP Born and Full-Term Born Children, and Demographic and Perinatal Characteristics of the EP/VP Born Sample. (continued)**

|                     | <b>GA, weeks<br/>M (SD)</b> | <b>BW, grams<br/>M (SD)</b> | <b>SGA,<br/>%</b> | <b>IVH<br/>grade<br/>I/II, %</b> | <b>IVH<br/>grade<br/>III/IV, %</b> | <b>PVL,<br/>%</b> | <b>BPD,<br/>%</b> | <b>NEC,<br/>%</b> | <b>Sepsis,<br/>%</b> | <b>PNS,<br/>%</b> | <b>Male,<br/>%</b> | <b>Nonwhite,<br/>%</b> |
|---------------------|-----------------------------|-----------------------------|-------------------|----------------------------------|------------------------------------|-------------------|-------------------|-------------------|----------------------|-------------------|--------------------|------------------------|
| <b>k</b>            | 70                          | 68                          | 50                | 50                               | 54                                 | 46                | 49                | 41                | 38                   | 31                | 66                 | 33                     |
| <b>Median (IQR)</b> | 28.5 (2.4)                  | 1103.6 (265.0)              | 16.5<br>(19.2)    | 16.5<br>(14.6)                   | 4.5 (6.8)                          | 3.6<br>(6.1)      | 27.0<br>(22.8)    | 4.6<br>(4.1)      | 28.9<br>(34.5)       | 16.1<br>(21.2)    | 50.0<br>(8.7)      | 11.9 (29.2)            |

*Abbreviations.* BAS = British Ability Scales, BPD = bronchopulmonary dysplasia, BW = birth weight, DAS = Differential Ability Scales, EP/VP = extremely preterm/very preterm, FT = full-term, GA = gestational age, IQ = intelligence quotient, IQR = interquartile range, IVH = intraventricular hemorrhage, k = number of studies, KABC = Kaufman Assessment Battery for Children, KBIT = Kaufman Brief Intelligence Test, M = mean, NA = not available, NEC = necrotizing enterocolitis, PNS = postnatal corticosteroids use, PPVT = Peabody Picture Vocabulary Test, PVL = periventricular leukomalacia, SB = Stanford Binet Intelligence Scale, SD = standard deviation, SGA = small for gestational age, TIQ = total IQ, WISC = Wechsler Intelligence Scale for Children, WJ-BIA = Woodcock-Johnson Brief Intelligence Assessment, WJ-GIA = Woodcock-Johnson General Intellectual Ability, WPPSI = Wechsler Preschool and Primary Scale of Intelligence

<sup>a</sup> When covering a period of more than one year, median birth year (rounded down) was used in the analysis.

<sup>b</sup> Weighted mean and pooled SD of subsamples.

<sup>c</sup> Mean and SD of subtest scores.

<sup>d</sup> BPD defined as oxygen requirement at 36 weeks postmenstrual age.

<sup>e</sup> BPD defined as oxygen requirement at 28 days of life.

<sup>f</sup> Definition of BPD was not mentioned

**eFigure 1. PRISMA Flowchart of the Study Selection Procedure.**

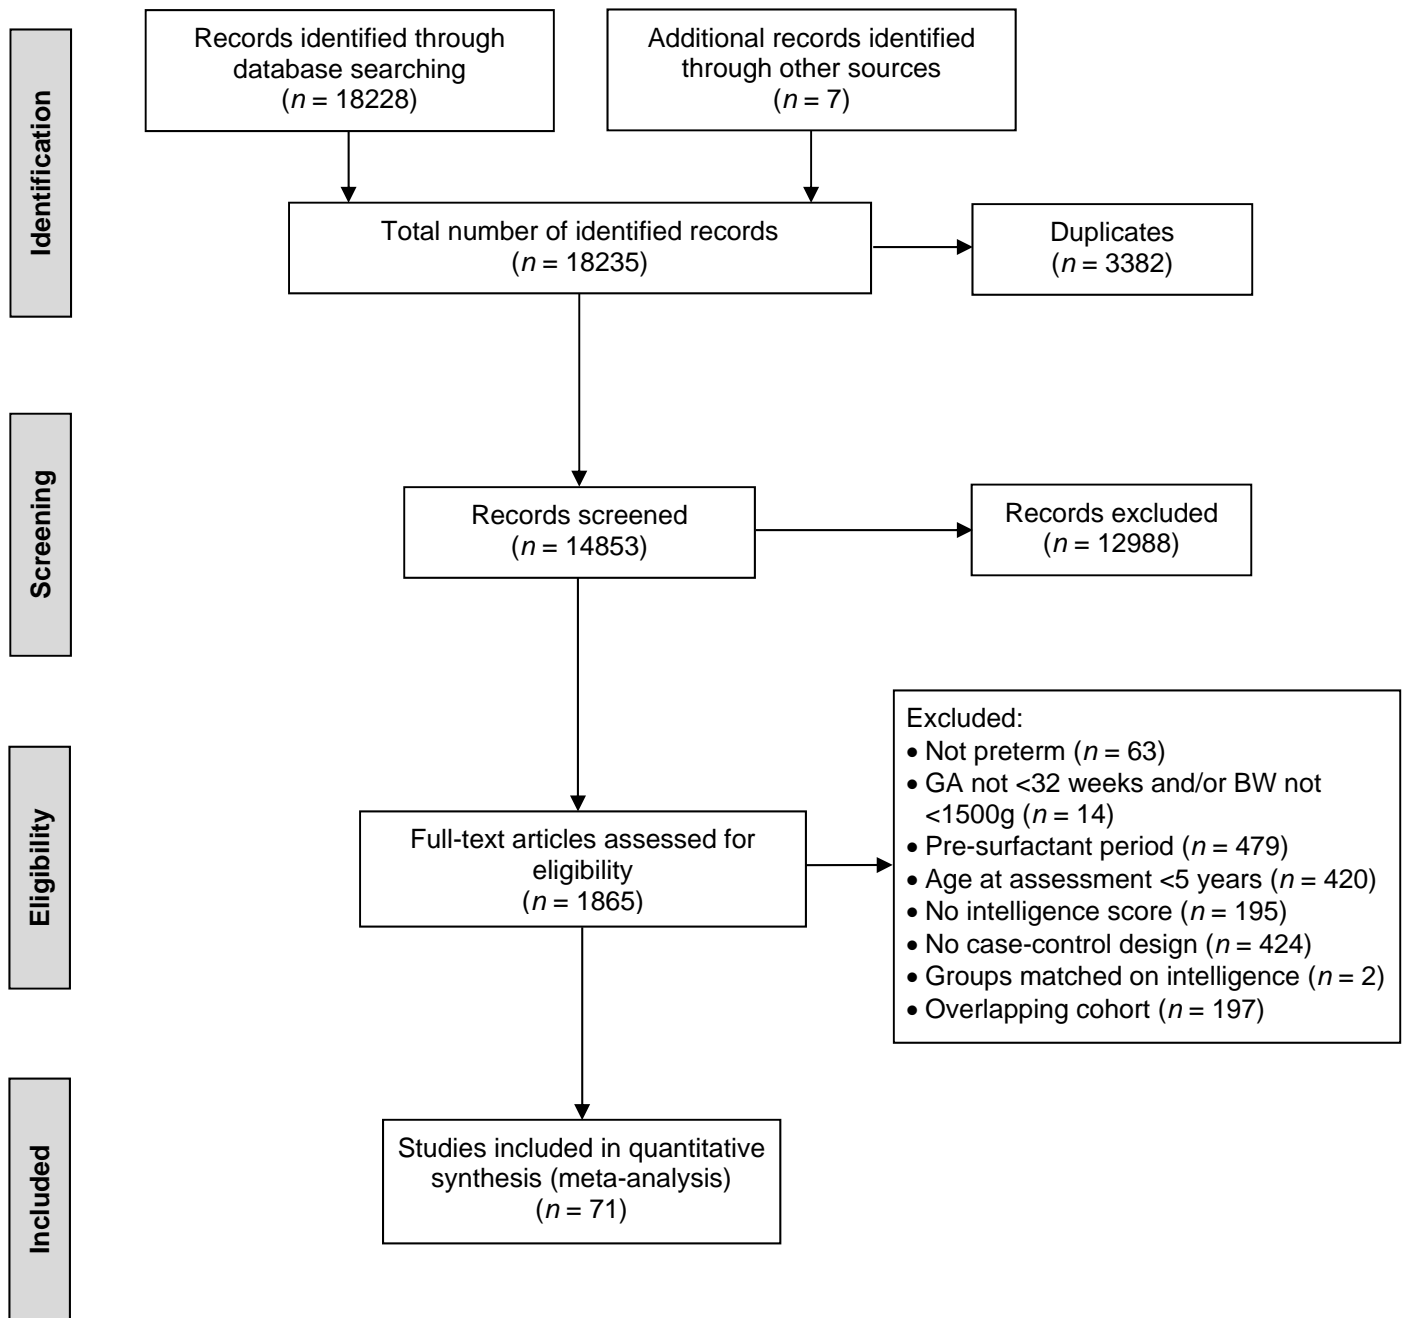

**eFigure 2. Forest Plot of Standardized Mean Differences (SMD) in IQ Between Extremely/Very Preterm Children and Full-Term Controls.**

| Study                  | SMD   | 95% CI      |             | Weight |
|------------------------|-------|-------------|-------------|--------|
|                        |       | Lower limit | Upper limit |        |
| Aarnoudse-Moens (2009) | -0.91 | -1.32       | -0.50       | 1.39   |
| Aarnoudse-Moens (2013) | -0.80 | -1.00       | -0.61       | 1.92   |
| Bayless (2007)         | -0.74 | -1.19       | -0.29       | 1.30   |
| Brecht (2015)          | -0.82 | -1.35       | -0.30       | 1.15   |
| Campbell (2015)        | -0.99 | -1.48       | -0.49       | 1.21   |
| Conrad (2010)          | -0.91 | -1.32       | -0.51       | 1.41   |
| Constable (2013)       | -0.55 | -1.20       | 0.10        | 0.91   |
| Crotty (2012)          | -1.34 | -1.62       | -1.05       | 1.70   |
| Damm (2015)            | -0.66 | -0.83       | -0.48       | 1.97   |
| De Amorim (2013)       | -1.24 | -1.89       | -0.60       | 0.92   |
| De Kieviet (2012)      | -0.57 | -0.92       | -0.22       | 1.55   |
| Delane (2016)          | -1.21 | -1.55       | -0.86       | 1.55   |
| Feng (2011)            | -1.28 | -1.86       | -0.70       | 1.03   |
| Fjortoft (2015)        | -1.65 | -2.20       | -1.10       | 1.09   |
| Ford (2016)            | -0.42 | -0.88       | 0.05        | 1.26   |
| Frye (2010)            | -0.45 | -1.14       | 0.25        | 0.83   |
| Geldof (2014)          | -0.69 | -0.99       | -0.39       | 1.67   |
| Georgsdottir (2012)    | -1.33 | -1.81       | -0.85       | 1.24   |
| Guarini (2009)         | -0.26 | -0.67       | 0.15        | 1.39   |
| Guarini (2014)         | -0.28 | -0.72       | 0.16        | 1.32   |
| Guarini (2016)         | -0.96 | -1.34       | -0.58       | 1.48   |
| Hagmann-Von Arx (2014) | -0.56 | -0.93       | -0.18       | 1.48   |
| Hansen (2004)          | -0.53 | -0.78       | -0.27       | 1.77   |
| Harvey (1999)          | -0.81 | -1.28       | -0.34       | 1.26   |
| Hellgren (2009)        | -0.66 | -1.04       | -0.28       | 1.48   |
| Holsti (2016)          | -1.39 | -1.68       | -1.11       | 1.71   |
| Howe (2011)            | -1.27 | -1.53       | -1.01       | 1.78   |
| Hutchinson (2013)      | -0.86 | -1.08       | -0.65       | 1.88   |
| Johnson (2005)         | -0.41 | -0.70       | -0.13       | 1.72   |
| Johnson (2009)         | -1.31 | -1.54       | -1.09       | 1.85   |
| Kallankari (2015)      | -0.71 | -1.16       | -0.26       | 1.31   |
| Larroque (2008)        | -0.67 | -0.78       | -0.56       | 2.08   |
| Lax (2013)             | -1.15 | -1.72       | -0.59       | 1.06   |
| Leijon (2015)          | -1.21 | -1.63       | -0.78       | 1.37   |
| Linden (2015)          | -0.75 | -1.10       | -0.40       | 1.55   |
| Linhares (2005)        | -1.07 | -1.73       | -0.40       | 0.89   |
| Litt (2012)            | -0.55 | -0.79       | -0.31       | 1.83   |
| Lohaugen (2011)        | -1.77 | -2.55       | -0.98       | 0.72   |
| Martinez-Cruz (2006)   | -0.71 | -1.10       | -0.32       | 1.45   |
| McGrath (2002)         | -0.79 | -1.18       | -0.40       | 1.45   |
| McNicholas (2014)      | -0.95 | -1.37       | -0.54       | 1.38   |
| Molloy (2014)          | -0.74 | -0.95       | -0.53       | 1.89   |
| Morsing (2011)         | -1.49 | -1.95       | -1.03       | 1.28   |
| Mu (2008)              | -1.13 | -1.46       | -0.80       | 1.60   |
| Mulder (2011)          | -1.16 | -1.69       | -0.64       | 1.14   |
| Murray (2014)          | -0.75 | -1.03       | -0.47       | 1.72   |
| Newsham (2007)         | -0.97 | -1.46       | -0.47       | 1.19   |
| Ni (2011)              | -0.35 | -0.88       | 0.18        | 1.13   |
| Northam (2012)         | -0.94 | -1.36       | -0.53       | 1.39   |
| Oliveira (2011)        | -1.28 | -1.92       | -0.65       | 0.93   |



**eFigure 2. Forest Plot of Standardized Mean Differences (SMD) in IQ Between Extremely/Very Preterm Children and Full-Term Controls. (continued)**

| Study                 | SMD          | 95% CI       |              | Study |
|-----------------------|--------------|--------------|--------------|-------|
|                       |              | Lower limit  | Upper limit  |       |
| Ortiz-Mantilla (2008) | -1.04        | -1.57        | -0.52        | 1.14  |
| Potharst (2011)       | -0.76        | -1.05        | -0.47        | 1.70  |
| Ritter (2003)         | -0.98        | -1.41        | -0.56        | 1.36  |
| Roldán-Tapia (2013)   | -2.47        | -3.07        | -1.87        | 1.00  |
| Sajeur (2015)         | -0.08        | -0.96        | 0.79         | 0.62  |
| Schneider (2014)      | -0.46        | -0.90        | -0.02        | 1.33  |
| Serenius (2016)       | -1.27        | -1.42        | -1.11        | 2.00  |
| Short (2003)          | -1.06        | -1.33        | -0.80        | 1.76  |
| Simms (2015)          | -0.36        | -0.65        | -0.07        | 1.70  |
| Smith (2011)          | -0.88        | -1.26        | -0.49        | 1.46  |
| Snyder (2007)         | -0.16        | -0.47        | 0.16         | 1.64  |
| Sølsnes (2015)        | -0.76        | -1.15        | -0.38        | 1.46  |
| Stolt (2014)          | -0.79        | -1.03        | -0.55        | 1.82  |
| Taylor (2010)         | -0.48        | -1.09        | 0.13         | 0.98  |
| Taylor (2011)         | -0.99        | -1.26        | -0.73        | 1.77  |
| Tinelli (2015)        | -0.52        | -1.06        | 0.01         | 1.11  |
| Van Braeckel (2008)   | -1.17        | -1.59        | -0.74        | 1.36  |
| Wehrle (2016)         | -0.72        | -1.17        | -0.28        | 1.32  |
| Williamson (2014)     | -0.35        | -0.82        | 0.12         | 1.25  |
| Wolfe (2015)          | -0.77        | -1.43        | -0.11        | 0.89  |
| Woodward (2012)       | -0.87        | -1.15        | -0.59        | 1.72  |
| <b>Summary</b>        | <b>-0.86</b> | <b>-0.94</b> | <b>-0.78</b> |       |

**eFigure 2. Forest Plot of Standardized Mean Differences (SMD) in IQ Between Extremely/Very Preterm Children and Full-Term Controls. (continued)**

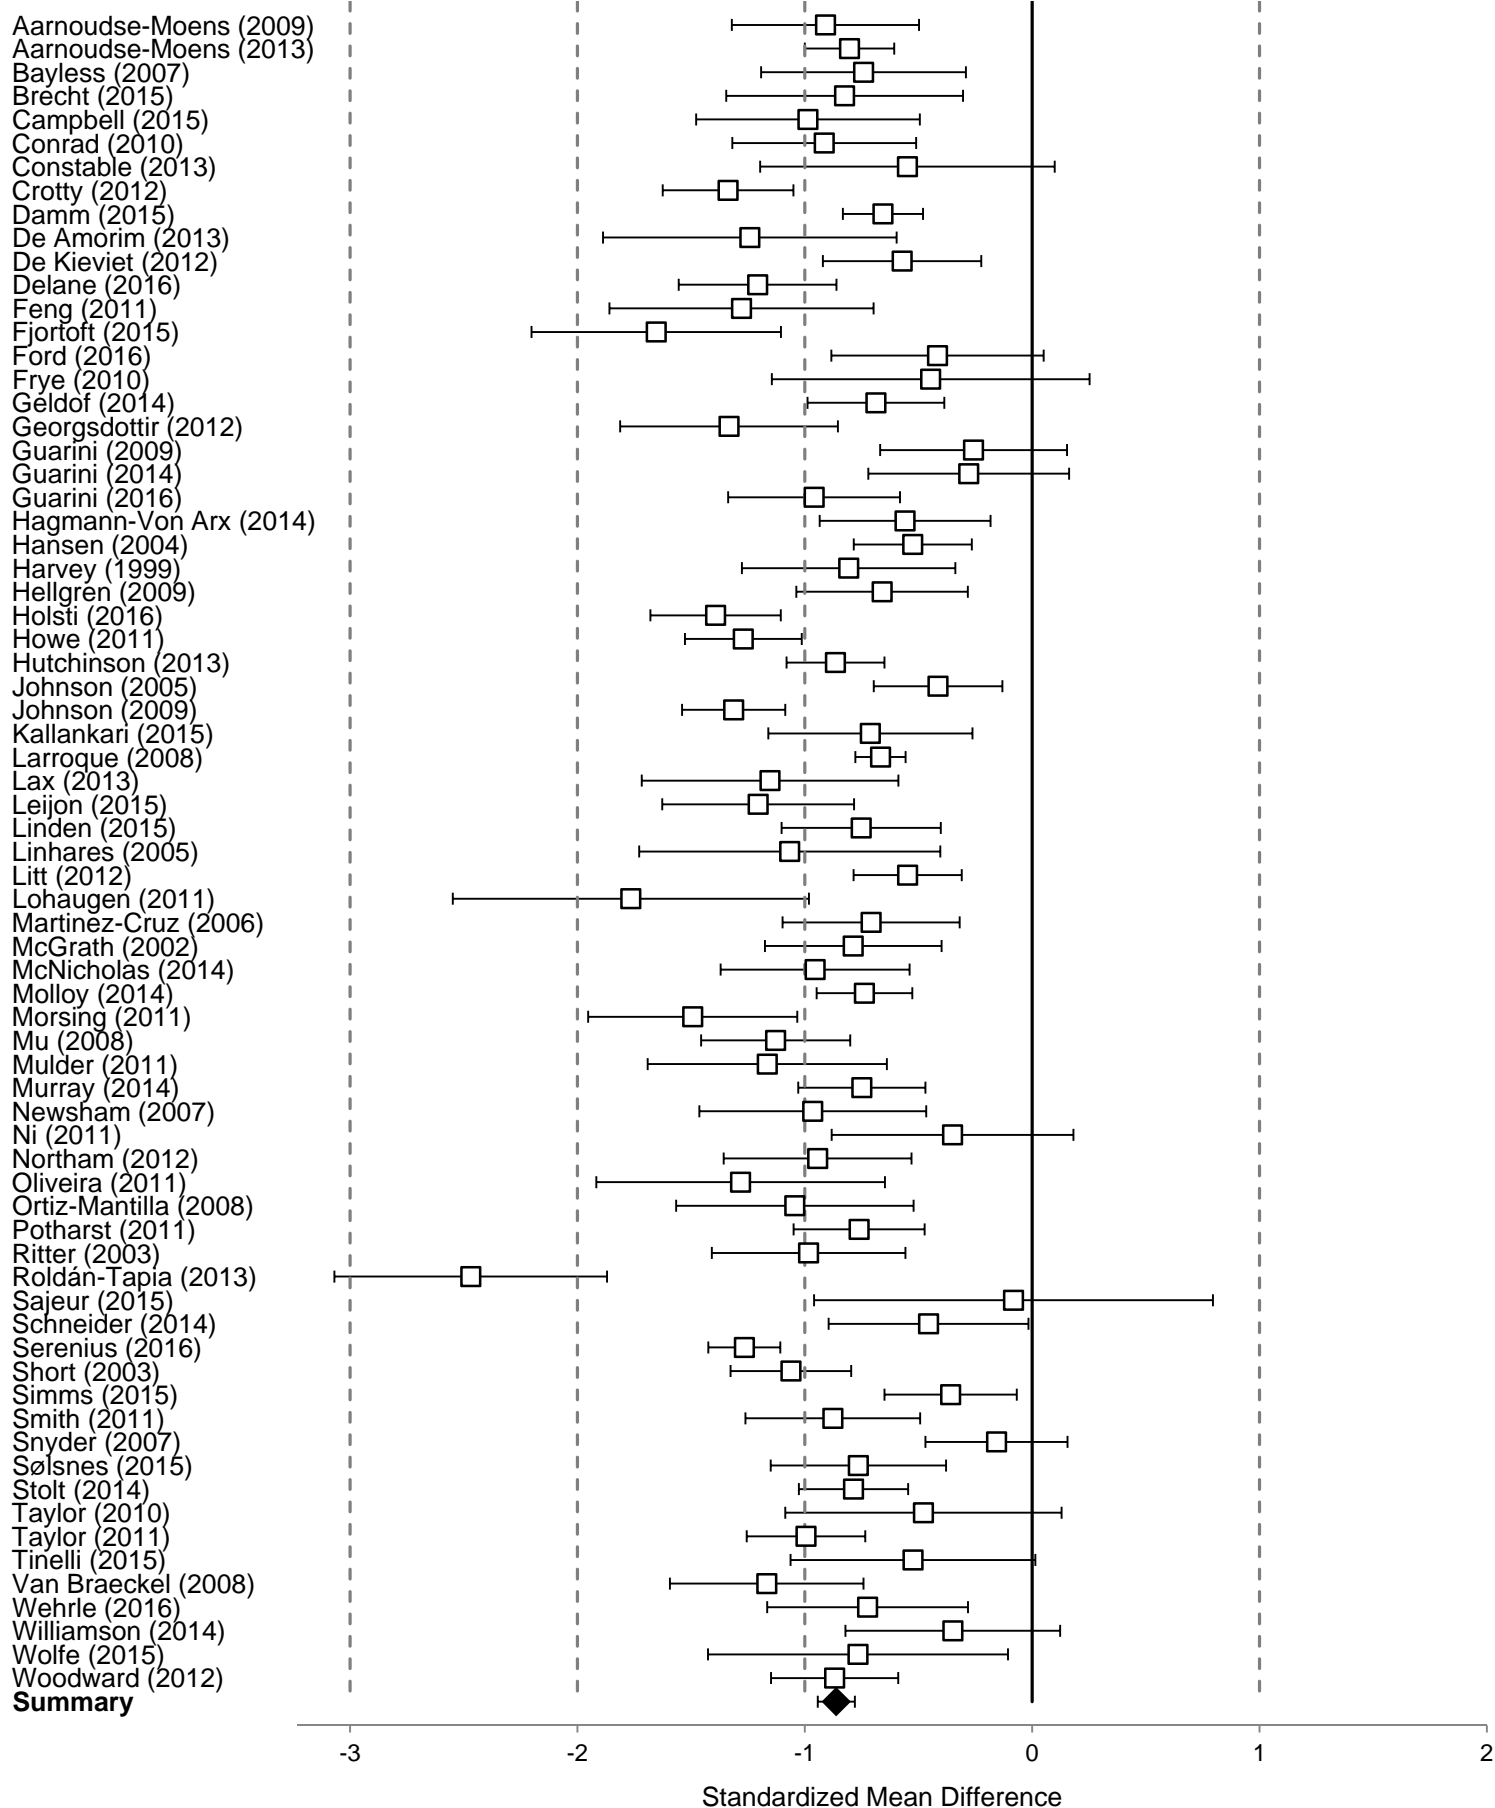

**eFigure 3. Funnel Plot of the Standardized Mean Difference in IQ for Each Study Plotted Against Its Standard Error.**

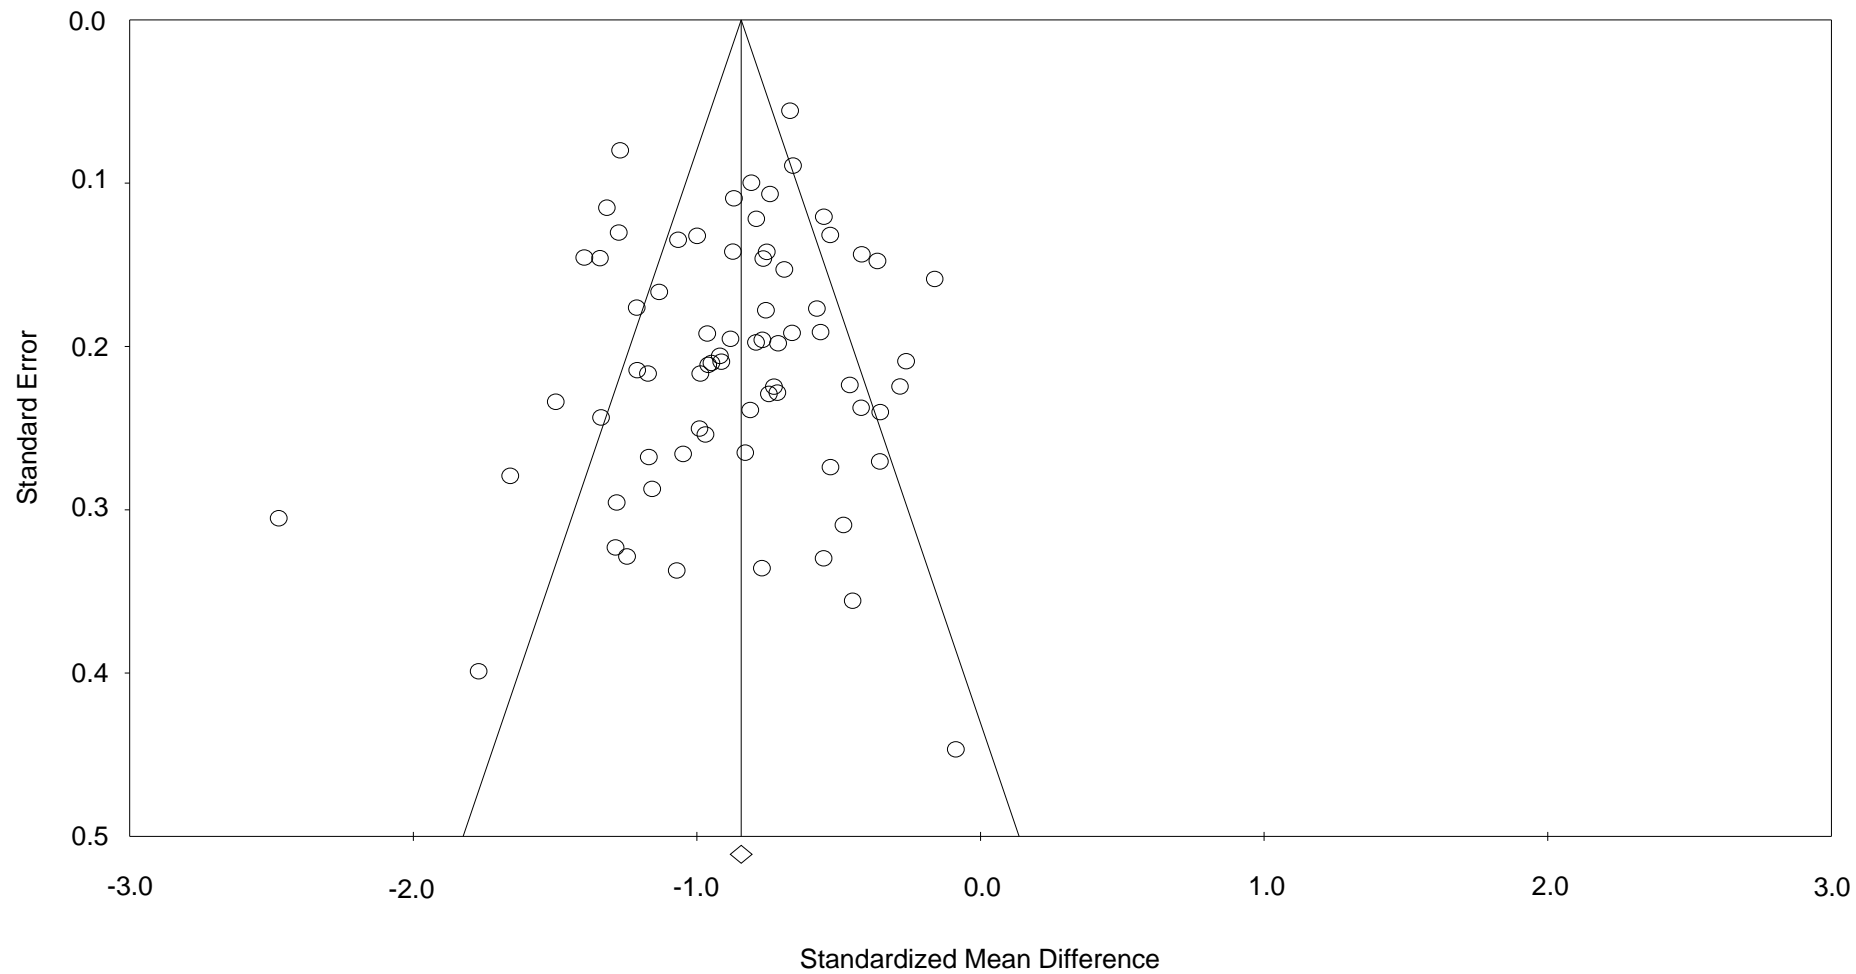

## References

1. Aarnoudse-Moens CS, Smidts DP, Oosterlaan J, Duivenvoorden HJ, Weisglas-Kuperus N. Executive function in very preterm children at early school age. *J Abnorm Child Psychol.* 2009;37(7):981-993.
2. Aarnoudse-Moens CS, Weisglas-Kuperus N, Duivenvoorden HJ, van Goudoever JB, Oosterlaan J. Executive function and IQ predict mathematical and attention problems in very preterm children. *PLoS One.* 2013;8(2):e55994.
3. Bayless S, Stevenson J. Executive functions in school-age children born very prematurely. *Early Hum Dev.* 2007;83(4):247-254.
4. Brecht KF, Goelz R, Bevot A, Kraegeloh-Mann I, Wilke M, Lidzba K. Postnatal Human Cytomegalovirus Infection in Preterm Infants Has Long-Term Neuropsychological Sequelae. *J Pediatrics.* 2015;166(4):834-839.
5. Campbell C, Horlin C, Reid C, et al. How do you think she feels? Vulnerability in empathy and the role of attention in school-aged children born extremely preterm. *Brit J Dev Psychol.* 2015;33(3):312-323.
6. Conrad AL, Richman L, Lindgren S, Nopoulos P. Biological and environmental predictors of behavioral sequelae in children born preterm. *Pediatrics.* 2010;125(1):e83-e89.
7. Constable RT, Vohr BR, Scheinost D, et al. A left cerebellar pathway mediates language in prematurely-born young adults. *Neuroimage.* 2013;64:371-378.
8. Crotty KC, Ahronovich MD, Baron IS, Baker R, Erickson K, Litman FR. Neuropsychological and behavioral effects of postnatal dexamethasone in extremely low birth weight preterm children at early school age. *J Perinatol.* 2012;32(2):139-146.
9. Damm G, Macha T, Petermann F, Voss W, Sens B. [Quality analyses of the development of preterm infants: results of the Lower-Saxonian preterm infant follow-up project and a comparison group of term infants]. *Z Evid Fortbild Qual Gesundheitswes.* 2015;109(1):6-17.
10. de Amorim RHC, de Castro Magalhães L, Malloy-Diniz LF, Campos AF. Cognitive profile of seven years old children born preterm with weight below 1500 grams. *Clin Neuropsychiatry.* 2013;10(2):72-78.
11. de Kieviet JF, van Elburg RM, Lafeber HN, Oosterlaan J. Attention problems of very preterm children compared with age-matched term controls at school-age. *J Pediatr.* 2012;161(5):824-829.
12. Delane L, Campbell C, Bayliss DM, et al. Poorer divided attention in children born very preterm can be explained by difficulty with each component task, not the executive requirement to dual-task. *Child Neuropsychol.* 2016:1-13.
13. Feng JJ, Xu X, Wang WP, Guo SJ, Yang H. Pattern visual evoked potential performance in preterm preschoolers with average intelligence quotients. *Early Hum Dev.* 2011;87(1):61-66.
14. Fjortoft T, Grunewaldt KH, Lohaugen GCC, Morkved S, Skranes J, Evensen KAI. Adaptive behavior in 10-11 year old children born preterm with a very low birth weight (VLBW). *Eur J Paediatr Neurol.* 2015;19(2):162-169.
15. Ford RM, Griffiths S, Neulinger K, Andrews G, Shum DH, Gray PH. Impaired prospective memory but intact episodic memory in intellectually average 7- to 9-year-olds born very preterm and/or very low birth weight. *Child Neuropsychol.* 2016;23(8):1-26.
16. Frye RE, Malmberg B, Swank P, Smith K, Landry S. Preterm birth and maternal responsiveness during childhood are associated with brain morphology in adolescence. *J Int Neuropsychol Soc.* 2010;16(5):784-794.
17. Geldof CJ, Oosterlaan J, Vuijk PJ, de Vries MJ, Kok JH, van Wassenaer-Leemhuis AG. Visual sensory and perceptual functioning in 5-year-old very preterm/very-low-birthweight children. *Dev Med Child Neurol.* 2014;56(9):862-868.
18. Georgsdottir I, Samundsen E, Leosdottir T, Simonardottir I, Egilson ST, Dagbjartsson A. Extremely Low Birthweight Infants in Iceland. Neurodevelopmental profile at five years of age. *Laknabladid.* 2012;90(11):747-754.

19. Guarini A, Sansavini A, Fabbri C, Alessandroni R, Faldella G, Karmiloff-Smith A. Reconsidering the impact of preterm birth on language outcome. *Early Hum Dev.* 2009;85(10):639-645.
20. Guarini A, Sansavini A, Fabbri M, Alessandroni R, Faldella G, Karmiloff-Smith A. Basic numerical processes in very preterm children: A critical transition from preschool to school age. *Early Hum Dev.* 2014;90(3):103-111.
21. Guarini A, Marini A, Savini S, Alessandroni R, Faldella G, Sansavini A. Linguistic features in children born very preterm at preschool age. *Dev Med Child Neurol.* 2016;58(9):949-956.
22. Hagmann-von Arx P, Perkinson-Gloor N, Brand S, et al. In school-age children who were born very preterm sleep efficiency is associated with cognitive function. *Neuropsychobiology.* 2014;70(4):244-252.
23. Hansen BM, Hoff B, Greisen G, Mortensen EL. Early nasal continuous positive airway pressure in a cohort of the smallest infants in Denmark: neurodevelopmental outcome at five years of age. *Acta Paediatr.* 2004;93(2):190-195.
24. Harvey JM, O'Callaghan MJ, Mohay H. Executive function of children with extremely low birthweight: A case control study. *Dev Med Child Neurol.* 1999;41(5):292-297.
25. Hellgren K, Aring E, Jacobson L, Ygge J, Martin L. Visuospatial skills, ocular alignment, and magnetic resonance imaging findings in very low birth weight adolescents. *J AAPOS.* 2009;13(3):273-279.
26. Holsti A, Adamsson M, Serenius F, Hagglof B, Farooqi A. Two-thirds of adolescents who received active perinatal care after extremely preterm birth had mild or no disabilities. *Acta Paediatr.* 2016;105:1288-1297
27. Howe TH, Sheu CF, Wang TN, Hsu YW, Wang LW. Neuromotor outcomes in children with very low birth weight at 5 yrs of age. *Am J Phys Med Rehabil.* 2011;90(8):667-680.
28. Hutchinson EA, De Luca CR, Doyle LW, Roberts G, Anderson PJ. School-age outcomes of extremely preterm or extremely low birth weight children. *Pediatrics.* 2013;131(4):e1053-e1061.
29. Johnson S, Ring W, Anderson P, Marlow N. Randomised trial of parental support for families with very preterm children: outcome at 5 years. *Arch Dis Child.* 2005;90(9):909-915.
30. Johnson S, Fawke J, Hennessy E, et al. Neurodevelopmental disability through 11 years of age in children born before 26 weeks of gestation. *Pediatrics.* 2009;124(2):e249-e257.
31. Kallankari H, Kaukola T, Olsen P, Ojaniemi M, Hallman M. Very preterm birth and foetal growth restriction are associated with specific cognitive deficits in children attending mainstream school. *Acta Paediatr.* 2015;104(1):84-90.
32. Larroque B, Ancel PY, Marret S, et al. Neurodevelopmental disabilities and special care of 5-year-old children born before 33 weeks of gestation (the EPIPAGE study): a longitudinal cohort study. *Lancet.* 2008;371(9615):813-820.
33. Lax ID, Duerden EG, Lin SY, et al. Neuroanatomical consequences of very preterm birth in middle childhood. *Brain Struct Funct.* 2013;218(2):575-585.
34. Leijon I, Ingemansson F, Nelson N, Wadsby M, Samuelsson S. Reading deficits in very low birthweight children are associated with vocabulary and attention issues at the age of seven. *Acta Paediatr.* 2015;105(1):60-68.
35. Linden MA, Cepeda IL, Synnes A, Grunau RE. Stress in parents of children born very preterm is predicted by child externalising behaviour and parent coping at age 7 years. *Arch Dis Child.* 2015;100(6):554-558.
36. Linhares MBM, Chimello JT, Bordin MBM, Carvalho AEV, Martinez FE. Desenvolvimento Psicológico na Fase Escolar de Crianças Nascidas Pré-termo em Comparação com Crianças Nascidas a Termo [Psychological Development of School-age Children Born Preterm in Comparison with Children Born Full-Term]. *Psicol Reflex Crit.* 2005;18(1):109-117.
37. Litt JS, Gerry Taylor H, Margevicius S, Schluchter M, Andreias L, Hack M. Academic achievement of adolescents born with extremely low birth weight. *Acta Paediatr.* 2012;101(12):1240-1245.

38. Løhaugen GCC, Antonsen I, Håberg A, et al. Computerized working memory training improves function in adolescents born at extremely low birth weight. *J Pediatr*. 2011;158(4):555-561.
39. Martinez-Cruz CF, Poblano A, Fernandez-Carrocer LA, Jimenez-Quiroz R, Tuyu-Torres N. Association between intelligence quotient scores and extremely low birth weight in school-age children. *Arch Med Res*. 2006;37(5):639-645.
40. McGrath M, Sullivan M. Birth weight, neonatal morbidities, and school age outcomes in full-term and preterm infants. *Issues Compr Pediatr Nurs*. 2002;25(4):231-254.
41. McNicholas F, Healy E, White M, et al. Medical, cognitive and academic outcomes of very low birth weight infants at age 10-14 years in Ireland. *Ir J Med Sci*. 2014;183(4):525-532.
42. Molloy CS, Wilson-Ching M, Doyle LW, Anderson VA, Anderson PJ. Visual memory and learning in extremely low-birth-weight/ extremely preterm adolescents compared with controls: A geographic study. *J Pediatr Psychol*. 2014;39(3):316-331.
43. Morsing E, Asard M, Ley D, Stjernqvist K, Marsal K. Cognitive function after intrauterine growth restriction and very preterm birth. *Pediatrics*. 2011;127(4):e874-e882.
44. Mu S-C, Tsou K-S, Hsu C-H, et al. Cognitive Development at Age 8 Years in Very Low Birth Weight Children in Taiwan. *J Formos Med Assoc*. 2008;107(12):915-920.
45. Mulder H, Pitchford NJ, Marlow N. Processing speed mediates executive function difficulties in very preterm children in middle childhood. *J Int Neuropsychol Soc*. 2011;17(3):445-454.
46. Murray AL, Scratch SE, Thompson DK, et al. Neonatal brain pathology predicts adverse attention and processing speed outcomes in very preterm and/or very low birth weight children. *Neuropsychology*. 2014;28(4):552-562.
47. Newsham D, Knox PC, Cooke RWI. Oculomotor control in children who were born very prematurely. *Invest Ophthalmol Vis Sci*. 2007;48(6):2595-2601.
48. Ni TL, Huang CC, Guo NW. Executive function deficit in preschool children born very low birth weight with normal early development. *Early Hum Dev*. 2011;87(2):137-141.
49. Northam GB, Liegeois F, Tournier JD, et al. Interhemispheric temporal lobe connectivity predicts language impairment in adolescents born preterm. *Brain*. 2012;135(12):3781-3798.
50. Oliveira GE, Magalhaes LC, Salmela LFT. Relationship between very low birth weight, environmental factors, and motor and cognitive development of children of 5 and 6 years old. *Rev Bras Fisioter*. 2011;15(2):138-145.
51. Ortiz-Mantilla S, Choudhury N, Leever H, Benasich AA. Understanding language and cognitive deficits in very low birth weight children. *Dev Psychobiol*. 2008;50(2):107-126.
52. Potharst ES, van Wassenaer AG, Houtzager BA, van Hus JW, Last BF, Kok JH. High incidence of multi-domain disabilities in very preterm children at five years of age. *J Pediatr*. 2011;159(1):79-85.
53. Ritter BC, Nelle M, Perrig W, Steinlin M, Everts R. Executive functions of children born very preterm-deficit or delay? *Eur J Pediatr*. 2013;172(4):473-483.
54. Roldán-Tapia MD, Ramos-Lizana J, Sánchez-Joya MM, Cánovas R, Bembibre-Serrano J. The relation between low birth weight in preterm children and their attentional abilities. *IJAP*. 2013;2(1):61-68.
55. Sayeur MS, Vannasing P, Tremblay E, et al. Visual development and neuropsychological profile in preterm children from 6 months to school age. *J Child Neurol*. 2015;30(9):1159-1173.
56. Schneider LA, Burns NR, Giles LC, et al. Cognitive abilities in preterm and term-born adolescents. *J Pediatr*. 2014;165(1):170-177.
57. Serenius F, Ewald U, Farooqi A, et al. Neurodevelopmental Outcomes Among Extremely Preterm Infants 6.5 Years After Active Perinatal Care in Sweden. *JAMA Pediatr*. 2016;170(10):954-963.
58. Short EJ, Klein NK, Lewis BA, et al. Cognitive and academic consequences of bronchopulmonary dysplasia and very low birth weight: 8-year-old outcomes. *Pediatrics*. 2003;112(5):e359.

59. Simms V, Gilmore C, Cragg L, Clayton S, Marlow N, Johnson S. Nature and origins of mathematics difficulties in very preterm children: a different etiology than developmental dyscalculia. *Pediatr Res*. 2015;77(2):389-395.
60. Smith JM. The impact of prematurity on language skills at school age. *J Speech Lang Hear*. 2011;57(3):901-916.
61. Snyder EH, Davis DW, Burns BM, Robinson JB. Examining attention networks in preschool children born with very low birth weights. *J Early Child Infant Psychol*. 2007;3:185-203.
62. Solsnes AE, Grunewaldt KH, Bjuland KJ, et al. Cortical morphometry and IQ in VLBW children without cerebral palsy born in 2003-2007. *Neuroimage*. 2015;8:193-201.
63. Stolt S, Matomäki J, Lind A, Lapinleimu H, Haataja L, Lehtonen L. The prevalence and predictive value of weak language skills in children with very low birth weight—A longitudinal study. *Acta Paediatr*. 2014;103(6):651-658.
64. Taylor NM, Jakobson LS. Representational momentum in children born preterm and at term. *Brain Cogn*. 2010;72(3):464-471.
65. Taylor HG, Klein N, Anselmo MG, Minich N, Espy KA, Hack M. Learning problems in kindergarten students with extremely preterm birth. *Arch Pediatr Adolesc Med*. 2011;165(9):819-825.
66. Tinelli F, Anobile G, Gori M, et al. Time, number and attention in very low birth weight children. *Neuropsychologia*. 2015;73:60-69.
67. Van Braeckel K, Butcher PR, Geuze RH, van Duijn MA, Bos AF, Bouma A. Less efficient elementary visuomotor processes in 7- to 10-year-old preterm-born children without cerebral palsy: an indication of impaired dorsal stream processes. *Neuropsychology*. 2008;22(6):755-764.
68. Wehrle FM, Kaufmann L, Benz LD, et al. Very preterm adolescents show impaired performance with increasing demands in executive function tasks. *Early Hum Dev*. 2016;92:37-43.
69. Williamson KE, Jakobson LS. Social perception in children born at very low birthweight and its relationship with social/behavioral outcomes. *J Child Psychol Psychiatry*. 2014;55(9):990-998.
70. Wolfe KR, Vannatta K, Nelin MA, Yeates KO. Executive functions, social information processing, and social adjustment in young children born with very low birth weight. *Child Neuropsychol*. 2015;21(1):41-54.
71. Woodward LJ, Clark CAC, Bora S, Inder TE. Neonatal White Matter Abnormalities an Important Predictor of Neurocognitive Outcome for Very Preterm Children. *PLoS One*. 2012;7(12).
